# Supplementary material for: Feasibility ofChlamydia trachomatisscreening and treatment in pregnant women in Lima, Peru: a prospective study in two large urban hospitals: Table 1
Source: HighWire-hosted journal article supplement (doi:10.1136/sextrans-2014-051531), 2014-08-08
Supplement: sextrans-2014-051531supp_abstract_in_Spanish.pdf [file sextrans-2014-051531supp_abstract_in_Spanish.pdf]

## Factibilidad de tamizaje y tratamiento de *Chlamydia trachomatis* en gestantes en Lima, Perú: un estudio prospectivo en dos grandes hospitales urbanos

**Objetivos:** *Chlamydia trachomatis*, asintomática en la mayoría de mujeres, causa efectos adversos significativos en gestantes y en recién nacidos. No existen programas para su tamizaje prenatal en América Latina. Determinamos la prevalencia de Chlamydia, la factibilidad y aceptabilidad de su tamizaje y la adherencia al tratamiento en gestantes de dos hospitales públicos en Lima, Perú.

**Métodos:** Ofrecimos el tamizaje para Chlamydia a gestantes  $\geq 16$  años durante su primer control prenatal utilizando hisopos vaginales auto-administrados. Contactamos a las pacientes positivas para Chlamydia dentro de los 14 días siguientes, y les solicitamos traer a su(s) pareja(s) sexual(es) al hospital para consejería y tratamiento directamente observado con azitromicina oral. Las gestantes que acudieron sin su pareja recibieron consejería y tratamiento observado y se les proporcionó azitromicina para que entreguen a su(s) pareja(s). Realizamos una prueba de cura al menos 3 semanas después del tratamiento.

**Resultados:** Abordamos a 640 gestantes para el estudio y reclutamos a 600 (93,7%). La edad media fue de 27,2 años (rango 16-47), la media de parejas sexuales en toda su vida fue 2,3 (rango 1-50) con una edad gestacional media de 26,1 semanas (rango 4-41). La prevalencia de Chlamydia fue del 10% (IC 95%: 7,7% - 12,7%). De las 60 pacientes positivas para Chlamydia, 59 (98%) fueron tratadas con una dosis de azitromicina. De las 59 pacientes tratadas, 52 (88%) regresaron para la prueba de cura. Todas las pacientes que aceptaron la prueba de cura (52) fueron tratadas con éxito: 46 (88%) tuvieron prueba de cura negativa luego de una dosis de azitromicina y 6 (12%) después del tratamiento con una segunda dosis.

**Conclusión:** El tamizaje y tratamiento para Chlamydia en el embarazo fue factible y muy aceptado en dos hospitales metropolitanos en Perú. La prevalencia de la infección por Chlamydia fue alta. Se requieren ensayos clínicos para evaluar la eficacia y el costo-efectividad del tamizaje y tratamiento de Chlamydia en gestantes para prevenir los resultados adversos en el embarazo.
